# Supplementary material for: Validation of the revised Oxford classification for IgA nephropathy considering treatment with corticosteroids/immunosuppressors
Source: PubMed Central journal article supplement (PMC7341848; doi:10.1038/s41598-020-68087-y), 2020-07-07
Supplement: 41598_2020_68087_MOESM1_ESM.pdf [file 41598_2020_68087_MOESM1_ESM.pdf]

# Validation of the revised Oxford classification for IgA nephropathy considering treatment with corticosteroids/immunosuppressors

Takahito Moriyama\*, Kazunori Karasawa, Yoei Miyabe,  
Kenichi Akiyama, Shota Ogura, Tomo Takabe, Naoko Sugiura,  
Momoko Seki, Yuko Iwabuchi, Keiko Uchida, Kosaku Nitta

**Affiliations:** Department of Nephrology, Tokyo Women's Medical  
University, Tokyo, Japan

Supplementary Figure S1. Flow diagram of patient recruitment and enrollment.

1,147 primary IgAN patients diagnosed at our institution were enrolled

276 Excluded  
149 Glomeruli < 8  
101 Observation period < 1 year  
without achieving ESRD  
26 Both of them

871 Oxford analysis cohort  
426 treated with immunosuppressors  
445 not treated with immunosuppressors

350 Excluded  
319 U-Prot < 0.5g/day  
7 eGFR  $\leq 30$  mL/min/1.73m<sup>2</sup>  
4 both of them  
3 achieving ESRD within 1 year  
17 insufficient data of U-Prot and/or eGFR

521 Original Oxford classification cohort  
287 treated with immunosuppressors  
234 not treated with immunosuppressors

Supplementary Table S1. Comparison of baseline characteristics among all patients, non-treatment, and treatment groups

| Baseline data                                      | All patients         | Non-treatment group | Treatment group     | P-value between non-treatment and treatment groups |
|----------------------------------------------------|----------------------|---------------------|---------------------|----------------------------------------------------|
| <b><i>Clinical findings</i></b>                    |                      |                     |                     |                                                    |
| Age (years)                                        | 32.0 (25.3-43.0)     | 33.0 (26.0-44.0)    | 31.0 (25.0-41.0)    | 0.8983                                             |
| Sex (Male /female)                                 | 293/227              | 123/94              | 170/133             | 0.8960                                             |
| BMI (kg/m <sup>2</sup> )                           | 21.5 (19.8-23.7)     | 21.6 (19.7-23.5)    | 21.5 (19.9-23.9)    | 0.9282                                             |
| SBP (mmHg)                                         | 122.0 (112.0-136.0)  | 124.0 (115.0-139.3) | 120.0 (111.0-132.0) | 0.0056                                             |
| DBP (mmHg)                                         | 77.0 (68.0-85.0)     | 79.0 (70.0-86.3)    | 76.0 (67.0-83.0)    | 0.0986                                             |
| MAP (mmHg)                                         | 92.0 (83.3-101.0)    | 93.0 (84.4-103.6)   | 90.7 (82.7-100.0)   | 0.0268                                             |
| <b><i>Laboratory findings</i></b>                  |                      |                     |                     |                                                    |
| TP (g/dL)                                          |                      |                     |                     |                                                    |
| Cr (mg/dl)                                         | 6.6 (6.1-7.0)        | 6.7 (6.1-7.1)       | 6.6 (6.1-7.0)       | 0.0845                                             |
| eGFR (ml/min/1.73m <sup>2</sup> )                  | 0.84 (0.69-1.08)     | 0.88 (0.69-1.18)    | 0.81 (0.68-1.02)    | 0.0092                                             |
| UA(mg/dl)                                          | 71.8 (56.2-90.3)     | 66.8 (52.6-85.6)    | 75.2 (57.1-94.0)    | 0.0098                                             |
| T-Cho (mg/dl)                                      | 5.7 (4.8-6.8)        | 5.8 (4.8-7.2)       | 5.7 (4.8-6.7)       | 0.3448                                             |
| TG (mg/dl)                                         | 202.9 (173.5-234.0)  | 192.0 (170.5-223.5) | 209.0 (176.5-239.5) | 0.0024                                             |
| U-prot (mg/dl)                                     | 107.5 (78.8-164.3)   | 111.5 (78.0-166.3)  | 106.0 (79.0-156.8)  | 0.3526                                             |
| U-RBC (counts/HF)<br>(5<, 5-25, 26-49, 50-99,100≤) | 1.17 (0.74-1.95)     | 1.00 (0.69-1.51)    | 1.3 (0.8-2.26)      | 0.0002                                             |
|                                                    | 47, 201, 90, 63, 108 | 26, 85, 35, 24, 46  | 21, 116, 55, 48, 62 | 0.1988                                             |
| <b><i>Histological findings</i></b>                |                      |                     |                     |                                                    |
| M0/M1                                              | 228/292              | 111/106             | 117/186             | 0.0045                                             |
| E0/E1                                              | 256/263              | 145/72              | 112/191             | <0.0001                                            |
| S0/S1                                              | 106/414              | 47/170              | 59/244              | 0.5424                                             |
| T0/T1/T2                                           | 326/156/38           | 128/70/19           | 198/86/19           | 0.2860                                             |
| C0/C1/C2                                           | 235/241/43           | 142/71/4            | 94/170/39           | <0.0001                                            |

**Abbreviations;** BMI: Body mass index, SBP: systolic blood pressure, DBP: diastolic blood pressure, MAP mean arterial pressure, TP: serum total protein, Cr: serum creatinine, eGFR: estimated glomerular filtration rate, UA: serum uric acid, T-cho: serum total cholesterol, TG: triglyceride, U-Prot: urinary protein excretion, U-RBC: urinary red blood cells, HPF: high power field, M: mesangial hypercellularity, E: endocapillary hypercellularity, S: segmental sclerosis, T: interstitial fibrosis/tubular atrophy, C: crescents,

Supplementary Figure S2. Renal survival rates of all patients in each Oxford classification

— 0  
— 1  
— 2

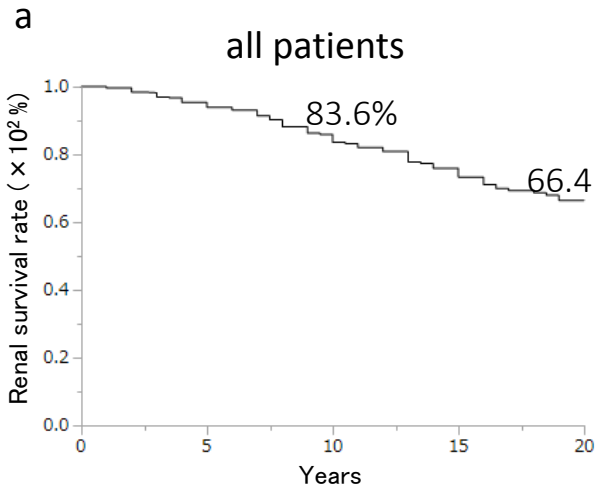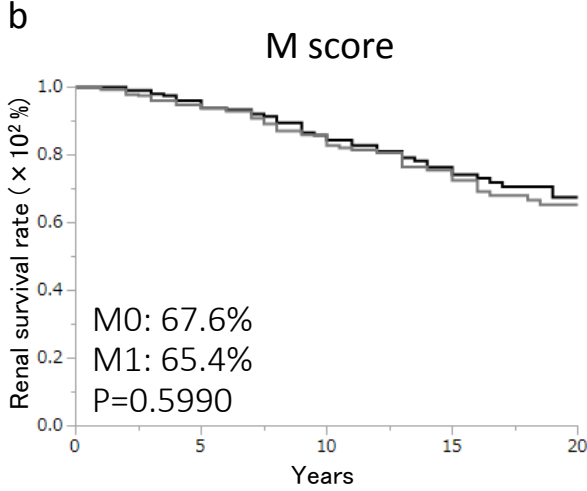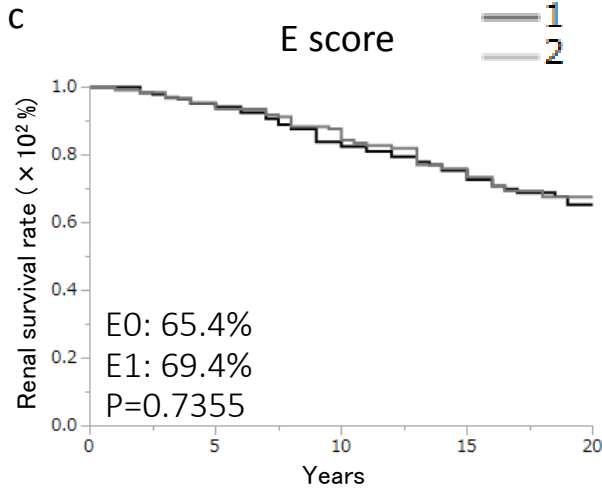

Number of patients

|     |     |    |
|-----|-----|----|
| 520 | 254 | 81 |
|-----|-----|----|

|        |     |    |
|--------|-----|----|
| M0 228 | 115 | 40 |
| M1 292 | 135 | 41 |

|        |     |    |
|--------|-----|----|
| E0 257 | 123 | 50 |
| E1 263 | 130 | 31 |

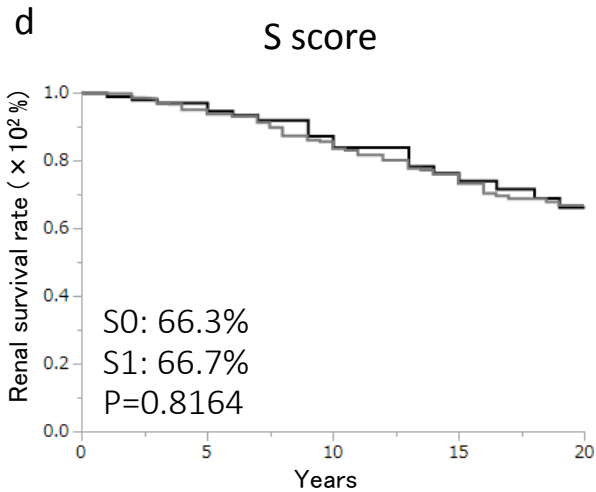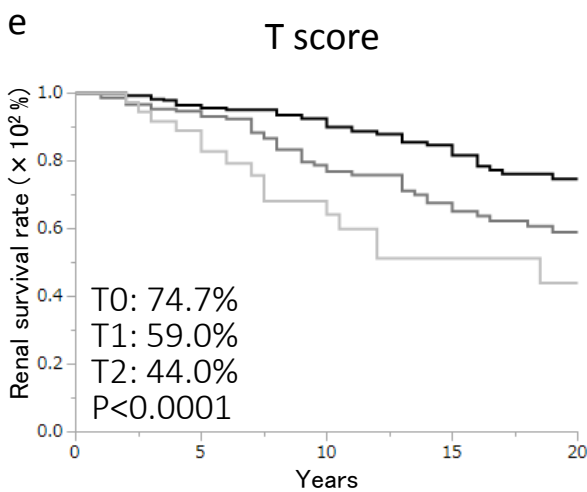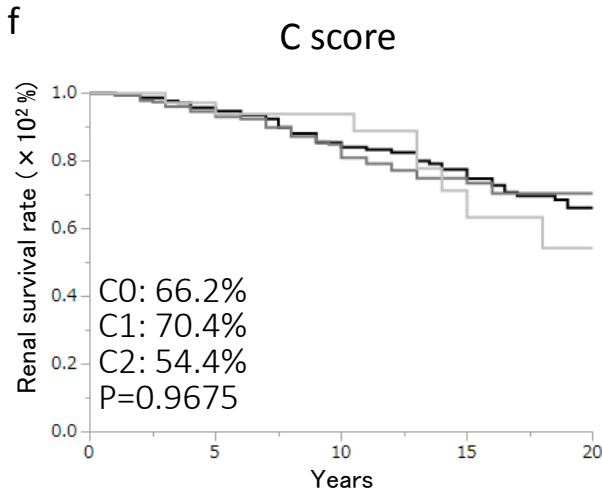

|        |     |    |
|--------|-----|----|
| S0 106 | 52  | 23 |
| S1 414 | 202 | 58 |

|        |     |    |
|--------|-----|----|
| T0 326 | 153 | 47 |
| T1 156 | 84  | 31 |
| T2 58  | 17  | 3  |

|        |     |    |
|--------|-----|----|
| C0 236 | 124 | 51 |
| C1 241 | 105 | 24 |
| C2 43  | 25  | 6  |

Supplementary Figure S3. Renal survival rates of the non-treatment group in each Oxford classification

— 0  
— 1  
— 2

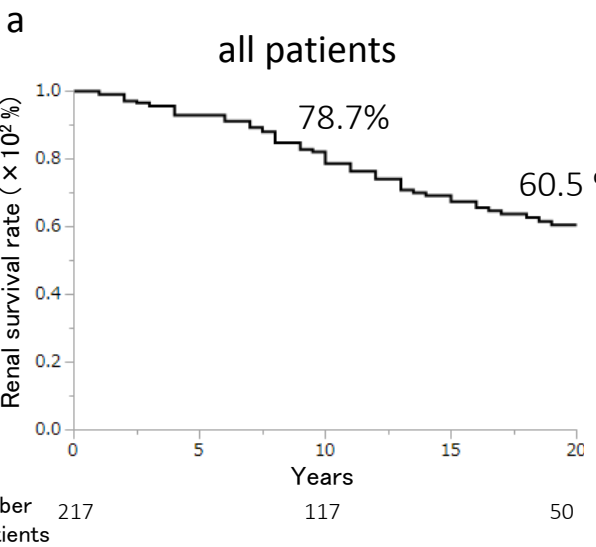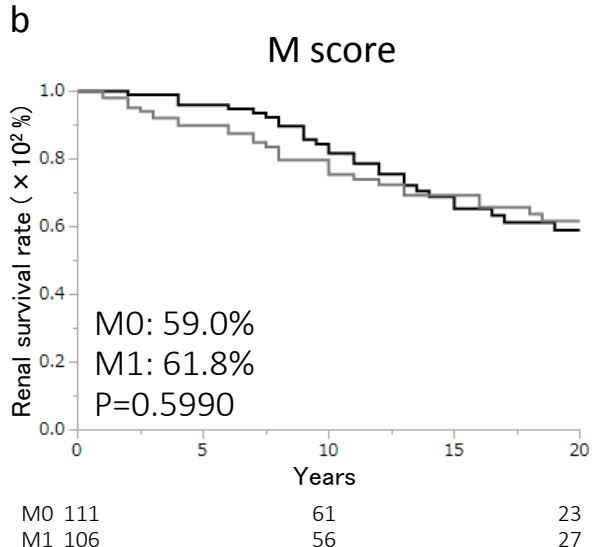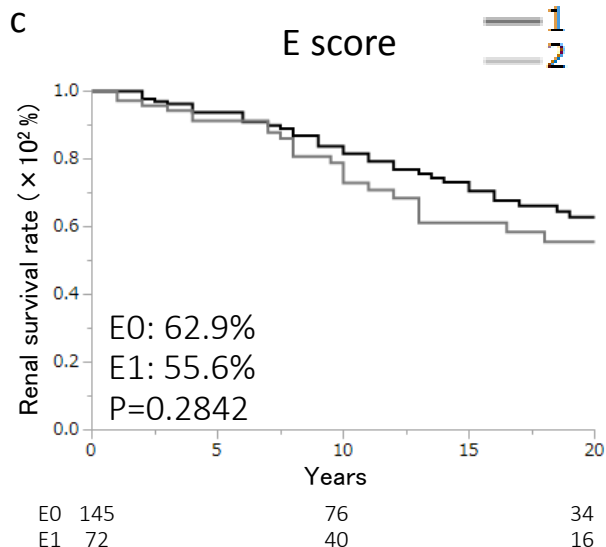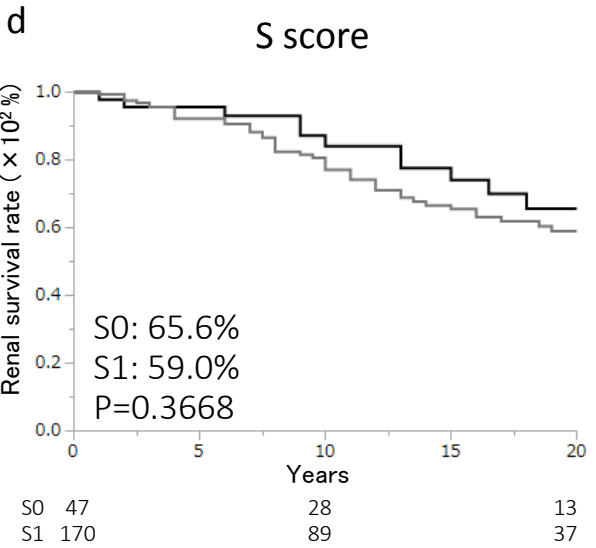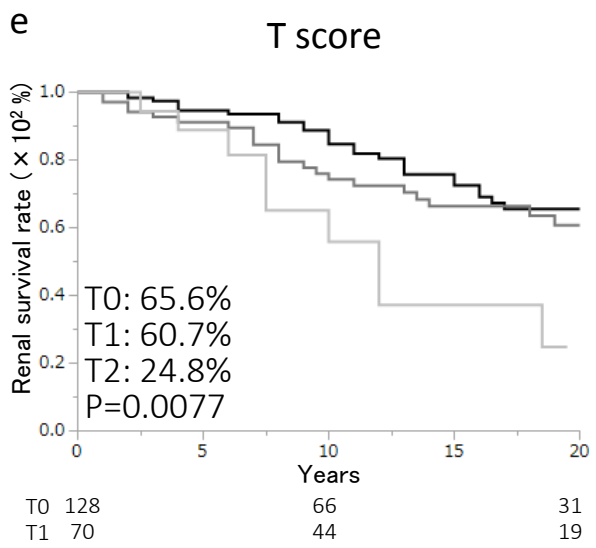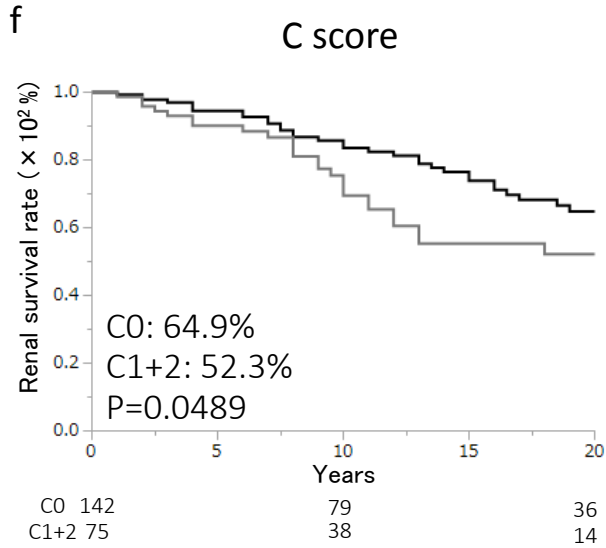

Supplementary Figure S4. Renal survival rates of the treatment group in each Oxford classification

0  
1  
2

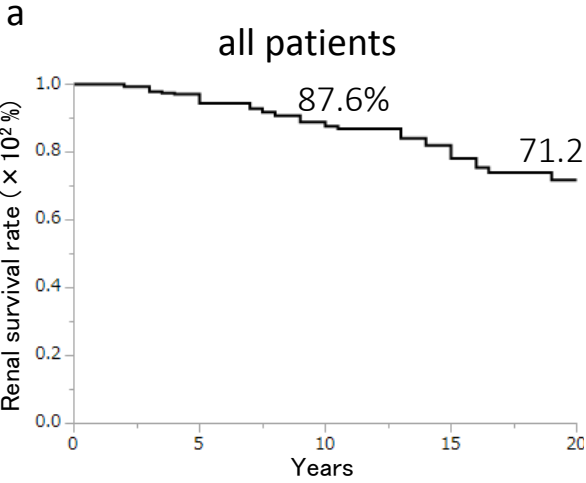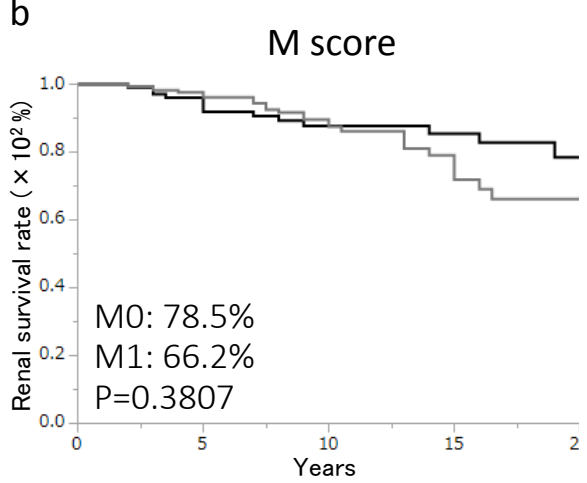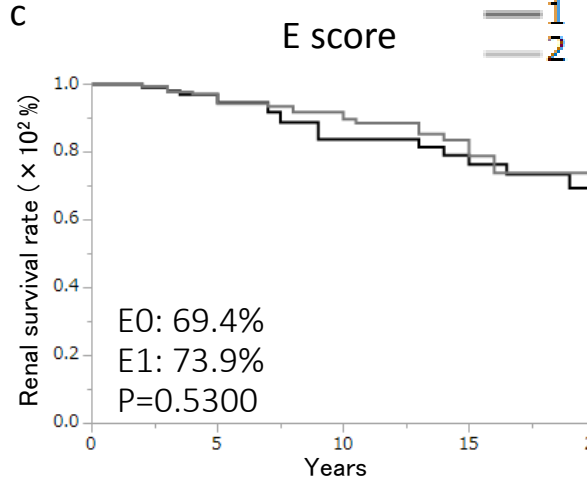

Number of patients

|     |     |    |
|-----|-----|----|
| 303 | 137 | 31 |
|-----|-----|----|

|    |     |    |    |
|----|-----|----|----|
| M0 | 117 | 54 | 17 |
| M1 | 186 | 83 | 14 |

|    |     |    |    |
|----|-----|----|----|
| E0 | 112 | 47 | 16 |
| E1 | 191 | 90 | 15 |

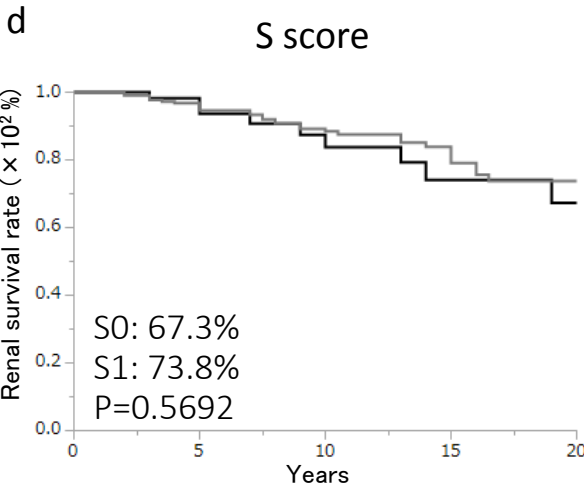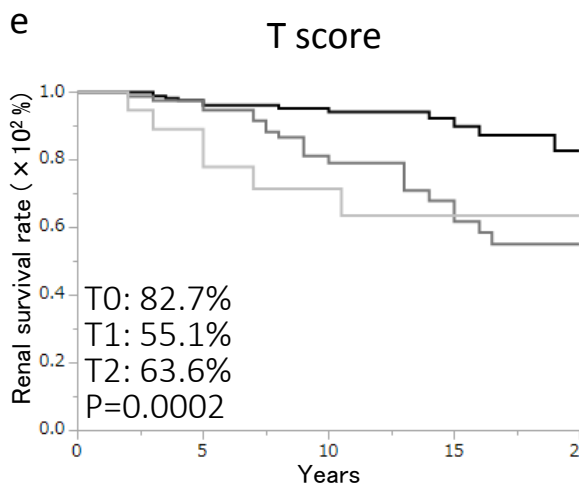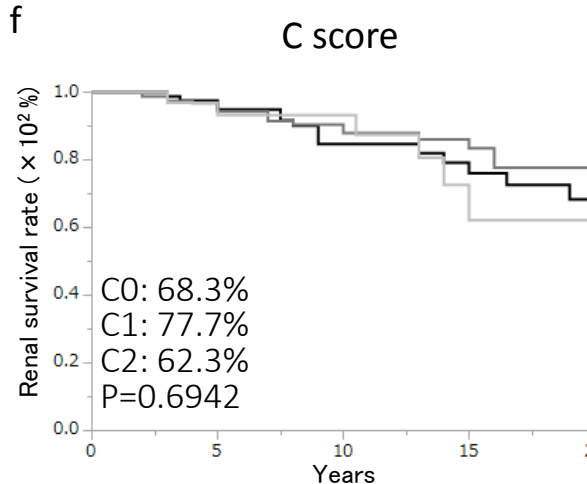

|    |     |     |    |
|----|-----|-----|----|
| S0 | 59  | 24  | 10 |
| S1 | 244 | 113 | 21 |

|    |     |    |    |
|----|-----|----|----|
| T0 | 198 | 87 | 16 |
| T1 | 86  | 40 | 12 |
| T2 | 19  | 10 | 3  |

|    |     |    |    |
|----|-----|----|----|
| C0 | 94  | 45 | 15 |
| C1 | 170 | 70 | 11 |
| C2 | 39  | 22 | 5  |

Supplementary Table S2. Independent risk factors for progression to ESRD in the multivariate Cox regression analysis in each group

| Baseline data                         | All patients              | Non-treatment group       | Treatment group           |
|---------------------------------------|---------------------------|---------------------------|---------------------------|
| <b><i>Clinical findings</i></b>       |                           |                           |                           |
| Age (per 10 years increase)           | 0.79, 0.54-1.14, P=0.2106 | 0.69, 0.39-1.19, P=0.1797 | 0.82, 0.46-1.44, P=0.4921 |
| Sex (male vs female)                  | 1.65, 1.07-2.57, P=0.1565 | 1.76, 0.95-3.37, P=0.0744 | 1.50, 0.75-2.98, P=0.2461 |
| BMI (per 1kg/m <sup>2</sup> increase) | 0.89, 0.76-1.04, P=0.3500 | 0.98, 0.79-1.21, P=0.8281 | 0.85, 0.66-1.09, p=0.2032 |
| MAP (per 10 mmHg increase)            | 1.29, 1.06-1.57, P=0.0117 | 1.30, 0.98-1.73, P=0.0724 | 1.30, 0.94-1.77, P=0.1077 |
| <b><i>Laboratory findings</i></b>     |                           |                           |                           |
| eGFR (per 30ml/min decrease)          | 2.39, 1.67-3.49, P<0.0001 | 2.29, 1.38-3.95, P=0.0011 | 2.26, 1.27-4.10, P=0.0052 |
| U-Prot (per 0.5 g/day increase)       | 1.74, 1.42-2.12, P<0.0001 | 1.70, 1.29-2.24, P=0.0002 | 2.00, 1.44-2.82, P<0.0001 |
| U-RBC (per 25/HPF increase)           | 1.74, 0.87-1.12, P=0.8542 | 1.13, 0.96-1.32, P=0.1319 | 0.86, 0.68-1.08, P=0.2076 |
| <b><i>Histological findings</i></b>   |                           |                           |                           |
| M1 (vs. M0)                           | 0.98, 0.64-1.49, P=0.8947 | 1.01, 0.58-1.77, P=0.9764 | 1.32, 0.65-2.80, P=0.3388 |
| E1 (vs. E0)                           | 0.92, 0.54-1.54, P=0.7484 | 0.91, 0.45-1.80, P=0.7969 | 1.12, 0.46-2.81, P=0.7999 |
| S1 (vs. S0)                           | 1.27, 0.75-2.24, P=0.3787 | 2.22, 1.05-5.14, P=0.0365 | 0.82, 0.38-1.97, P=0.6458 |
| T1-2 (per 1 grade increase)           | 1.13, 0.81-1.56, P=0.4735 | 0.95, 0.58-1.52, P=0.8288 | 1.38, 0.80-2.37, P=0.2387 |
| C1-2 (per 1 grade increase)           | 0.96, 0.64-1.44, P=0.8496 | 1.52, 0.86-2.66 P=0.1467  | 0.73, 0.35-1.46, P=0.3830 |

**Abbreviations;** BMI: Body mass index, MAP mean arterial pressure, TP: serum total protein, eGFR: estimated glomerular filtration rate, U-Prot: urinary protein excretion, U-RBC: urinary red blood cells, M: mesangial hypercellularity, E: endocapillary hypercellularity, S: segmental sclerosis, T: interstitial fibrosis/tubular atrophy, C: crescents,
